# Supplementary material for: Dating genomic variants and shared ancestry in population-scale sequencing data
Source: PubMed Central journal article supplement (PMC6992231; doi:10.1371/journal.pbio.3000586), 2020-01-17
Supplement: pbio.3000586.s010.pdf [file pbio.3000586.s010.pdf]

| Population group | Frequency range (%) | (A) Frequency within population |                        |                        |                        | (B) Geographically restricted variants |                        |                        |                        | (C) Strictly cosmopolitan variants |                        |                        |                        |
|------------------|---------------------|---------------------------------|------------------------|------------------------|------------------------|----------------------------------------|------------------------|------------------------|------------------------|------------------------------------|------------------------|------------------------|------------------------|
|                  |                     | <i>N</i>                        | <i>Q</i> <sub>25</sub> | <i>Q</i> <sub>50</sub> | <i>Q</i> <sub>75</sub> | <i>N</i>                               | <i>Q</i> <sub>25</sub> | <i>Q</i> <sub>50</sub> | <i>Q</i> <sub>75</sub> | <i>N</i>                           | <i>Q</i> <sub>25</sub> | <i>Q</i> <sub>50</sub> | <i>Q</i> <sub>75</sub> |
| <b>AFR</b>       | (0, 0.5]            | 8,933,432                       | 351                    | 670                    | 1,287                  | 5,140,255                              | 309                    | 607                    | 1,244                  | 476,121                            | 1,169                  | 1,902                  | 3,155                  |
|                  | (0.5, 1.0]          | 2,699,024                       | 886                    | 1,558                  | 2,857                  | 1,536,213                              | 826                    | 1,439                  | 2,643                  | 191,398                            | 1,840                  | 2,574                  | 4,732                  |
|                  | (1.0, 2.5]          | 3,200,737                       | 1,497                  | 2,568                  | 5,247                  | 1,081,782                              | 1,362                  | 2,332                  | 4,467                  | 293,687                            | 2,158                  | 3,156                  | 8,779                  |
|                  | (2.5, 5.0]          | 2,186,932                       | 2,270                  | 4,128                  | 10,568                 | 246,828                                | 2,117                  | 3,748                  | 8,313                  | 338,261                            | 2,533                  | 4,417                  | 14,638                 |
|                  | (5.0, 10]           | 1,826,818                       | 3,055                  | 6,692                  | 16,831                 | 31,552                                 | 2,694                  | 5,072                  | 12,363                 | 513,291                            | 3,197                  | 8,176                  | 19,530                 |
|                  | (10, 25]            | 1,681,460                       | 5,225                  | 15,137                 | 25,749                 | 805                                    | 3,290                  | 8,142                  | 17,928                 | 919,982                            | 5,431                  | 17,092                 | 27,615                 |
|                  | (25, 50]            | 694,784                         | 17,662                 | 28,246                 | 37,593                 | 0                                      | –                      | –                      | –                      | 604,276                            | 18,542                 | 29,019                 | 38,187                 |
|                  | (50, 100]           | 300,996                         | 33,911                 | 41,749                 | 48,871                 | 0                                      | –                      | –                      | –                      | 297,700                            | 34,049                 | 41,845                 | 48,941                 |
| <b>AMR</b>       | (0, 0.5]            | 8,124,067                       | 407                    | 1,125                  | 3,186                  | 634,975                                | 97                     | 145                    | 222                    | 105,375                            | 1,237                  | 2,684                  | 10,711                 |
|                  | (0.5, 1.0]          | 1,920,838                       | 823                    | 2,390                  | 8,016                  | 87,768                                 | 144                    | 218                    | 321                    | 110,129                            | 1,539                  | 3,367                  | 13,708                 |
|                  | (1.0, 2.5]          | 1,861,646                       | 1,117                  | 3,217                  | 13,840                 | 32,732                                 | 340                    | 454                    | 584                    | 362,381                            | 1,937                  | 4,488                  | 17,220                 |
|                  | (2.5, 5.0]          | 827,543                         | 1,460                  | 3,597                  | 16,886                 | 13,699                                 | 554                    | 662                    | 801                    | 430,222                            | 2,323                  | 5,750                  | 19,605                 |
|                  | (5.0, 10]           | 784,043                         | 2,076                  | 4,897                  | 19,281                 | 6,011                                  | 642                    | 751                    | 896                    | 602,870                            | 2,614                  | 7,301                  | 21,384                 |
|                  | (10, 25]            | 1,032,974                       | 2,885                  | 10,238                 | 24,772                 | 750                                    | 667                    | 773                    | 887                    | 981,035                            | 3,049                  | 11,263                 | 25,301                 |
|                  | (25, 50]            | 663,726                         | 4,157                  | 19,824                 | 33,473                 | 1                                      | –                      | –                      | –                      | 662,766                            | 4,166                  | 19,850                 | 33,488                 |
|                  | (50, 100]           | 379,938                         | 22,142                 | 36,490                 | 46,057                 | 0                                      | –                      | –                      | –                      | 379,938                            | 22,142                 | 36,490                 | 46,057                 |
| <b>EAS</b>       | (0, 0.5]            | 4,452,108                       | 257                    | 377                    | 694                    | 2,419,536                              | 219                    | 299                    | 402                    | 588,313                            | 1,417                  | 3,175                  | 15,178                 |
|                  | (0.5, 1.0]          | 830,225                         | 441                    | 580                    | 956                    | 473,651                                | 400                    | 496                    | 620                    | 127,379                            | 2,677                  | 7,679                  | 21,953                 |
|                  | (1.0, 2.5]          | 863,803                         | 665                    | 949                    | 3,175                  | 290,434                                | 556                    | 678                    | 838                    | 246,062                            | 2,753                  | 7,939                  | 22,488                 |
|                  | (2.5, 5.0]          | 566,841                         | 1,124                  | 2,521                  | 12,564                 | 59,809                                 | 789                    | 944                    | 1,167                  | 295,616                            | 2,849                  | 8,469                  | 22,505                 |
|                  | (5.0, 10]           | 581,311                         | 2,056                  | 4,592                  | 19,164                 | 9,022                                  | 885                    | 1,061                  | 1,344                  | 437,605                            | 2,885                  | 9,123                  | 23,237                 |
|                  | (10, 25]            | 880,951                         | 2,817                  | 9,193                  | 24,394                 | 404                                    | 966                    | 1,205                  | 1,581                  | 820,256                            | 3,063                  | 11,130                 | 25,395                 |
|                  | (25, 50]            | 654,316                         | 3,700                  | 17,149                 | 31,826                 | 5                                      | 789                    | 826                    | 829                    | 650,087                            | 3,740                  | 17,325                 | 31,924                 |
|                  | (50, 100]           | 469,485                         | 14,392                 | 32,707                 | 44,104                 | 1                                      | –                      | –                      | –                      | 469,398                            | 14,411                 | 32,711                 | 44,106                 |
| <b>EUR</b>       | (0, 0.5]            | 5,501,819                       | 272                    | 488                    | 2,002                  | 952,272                                | 152                    | 221                    | 309                    | 236,433                            | 2,244                  | 6,848                  | 21,733                 |
|                  | (0.5, 1.0]          | 1,000,000                       | 463                    | 681                    | 1,381                  | 78,287                                 | 272                    | 356                    | 465                    | 131,350                            | 2,031                  | 5,102                  | 19,648                 |
|                  | (1.0, 2.5]          | 1,152,780                       | 752                    | 1,138                  | 3,489                  | 11,207                                 | 357                    | 458                    | 593                    | 314,046                            | 2,005                  | 4,688                  | 18,342                 |
|                  | (2.5, 5.0]          | 776,938                         | 1,148                  | 2,421                  | 11,344                 | 46                                     | 535                    | 720                    | 989                    | 401,255                            | 2,167                  | 5,045                  | 18,692                 |
|                  | (5.0, 10]           | 747,466                         | 1,985                  | 4,451                  | 18,440                 | 0                                      | –                      | –                      | –                      | 566,483                            | 2,500                  | 6,629                  | 21,036                 |
|                  | (10, 25]            | 1,000,157                       | 2,885                  | 9,925                  | 24,724                 | 0                                      | –                      | –                      | –                      | 940,136                            | 3,010                  | 10,874                 | 25,295                 |
|                  | (25, 50]            | 657,062                         | 3,998                  | 18,937                 | 32,945                 | 0                                      | –                      | –                      | –                      | 654,305                            | 4,011                  | 19,001                 | 32,986                 |
|                  | (50, 100]           | 390,799                         | 19,765                 | 35,465                 | 45,555                 | 0                                      | –                      | –                      | –                      | 390,708                            | 19,779                 | 35,469                 | 45,558                 |
| <b>SAS</b>       | (0, 0.5]            | 5,608,105                       | 274                    | 428                    | 737                    | 2,193,373                              | 199                    | 295                    | 418                    | 136,412                            | 982                    | 2,245                  | 15,009                 |
|                  | (0.5, 1.0]          | 1,481,990                       | 474                    | 689                    | 1,188                  | 668,101                                | 385                    | 502                    | 655                    | 124,372                            | 1,277                  | 3,114                  | 15,916                 |
|                  | (1.0, 2.5]          | 1,359,096                       | 770                    | 1,167                  | 3,219                  | 381,602                                | 589                    | 740                    | 946                    | 292,606                            | 1,861                  | 4,417                  | 18,160                 |
|                  | (2.5, 5.0]          | 777,344                         | 1,374                  | 2,839                  | 12,598                 | 77,540                                 | 892                    | 1,088                  | 1,427                  | 389,781                            | 2,337                  | 5,594                  | 19,259                 |
|                  | (5.0, 10]           | 764,143                         | 2,346                  | 5,265                  | 18,799                 | 13,221                                 | 1,027                  | 1,273                  | 1,837                  | 613,616                            | 2,636                  | 6,868                  | 20,621                 |
|                  | (10, 25]            | 1,046,826                       | 3,018                  | 10,510                 | 24,510                 | 513                                    | 1,135                  | 1,415                  | 1,929                  | 1,017,345                          | 3,067                  | 10,952                 | 24,770                 |
|                  | (25, 50]            | 676,707                         | 4,194                  | 19,501                 | 33,013                 | 5                                      | 1,467                  | 1,492                  | 2,063                  | 676,430                            | 4,197                  | 19,507                 | 33,016                 |
|                  | (50, 100]           | 384,158                         | 22,014                 | 36,446                 | 46,031                 | 0                                      | –                      | –                      | –                      | 384,154                            | 22,015                 | 36,446                 | 46,031                 |
