# Supplementary material for: Dating genomic variants and shared ancestry in population-scale sequencing data
Source: PLoS Biol. 2020 Jan 17;18(1):e3000586. doi: 10.1371/journal.pbio.3000586 (PMC6992231; doi:10.1371/journal.pbio.3000586)
Supplement: S1 Table — The table shows the total number (Nall) of variants available in the Atlas of Variant Age on chromosomes 1–22, as well as the number of variants dated using data from the TGP alone (NTGP) and the SGDP alone (NSGDP). Additionally, variants present in both data sets were dated using independently inferred pairwise TMRCA results from the TGP and SGDP to obtain a combined age estimate (NCombined). The number of haplotype pairs at which shared haplotype segments and TMRCA were inferred is shown for the two data sources; numbers are shown as the sum of concordant and discordant pairs analyzed per chromosome. See S3 Text for details about the analysis of TGP and SGDP sample data. Full result data sets for each variant, including the results of each pairwise analysis and age estimates obtained under each clock model (mutation, recombination, and joint clock; see S1 Text), are publicly available online at https://human.genome.dating/. SGDP, Simons Genome Diversity Project; TGP, 1000 Genomes Project; TMRCA, time to the most recent common ancestor. (PDF) [file pbio.3000586.s009.pdf]

| Chr.  | $N_{\text{all}}$ | $N_{\text{TGP}}$ | $N_{\text{SGDP}}$ | $N_{\text{Combined}}$ | Haplotype pairs analyzed in <b>TGP</b>          |               |               | Haplotype pairs analyzed in <b>SGDP</b>     |              |             |
|-------|------------------|------------------|-------------------|-----------------------|-------------------------------------------------|---------------|---------------|---------------------------------------------|--------------|-------------|
|       |                  |                  |                   |                       | Sum =                                           | Concordant +  | Discordant    | Sum =                                       | Concordant + | Discordant  |
| 1     | 3,603,845        | 3,434,810        | 1,242,878         | 1,073,843             | 2,361,753,523 =                                 | 670,234,719 + | 1,691,518,804 | 178,223,566 =                               | 57,340,106 + | 120,883,460 |
| 2     | 3,909,601        | 3,727,112        | 1,354,976         | 1,172,487             | 2,552,046,545 =                                 | 717,105,655 + | 1,834,940,890 | 193,049,416 =                               | 61,961,663 + | 131,087,753 |
| 3     | 3,246,604        | 3,078,989        | 1,184,447         | 1,016,832             | 2,121,176,886 =                                 | 604,531,045 + | 1,516,645,841 | 170,540,962 =                               | 55,202,026 + | 115,338,936 |
| 4     | 3,207,690        | 3,055,978        | 1,156,613         | 1,004,901             | 2,122,460,565 =                                 | 616,887,880 + | 1,505,572,685 | 167,838,575 =                               | 55,197,442 + | 112,641,133 |
| 5     | 2,936,062        | 2,777,306        | 1,054,634         | 895,878               | 1,909,734,447 =                                 | 541,892,101 + | 1,367,842,346 | 151,025,979 =                               | 48,366,615 + | 102,659,364 |
| 6     | 2,841,180        | 2,703,481        | 1,023,730         | 886,031               | 1,883,434,856 =                                 | 551,467,803 + | 1,331,967,053 | 148,183,411 =                               | 48,575,536 + | 99,607,875  |
| 7     | 2,651,520        | 2,530,710        | 895,609           | 774,799               | 1,748,759,380 =                                 | 502,479,763 + | 1,246,279,617 | 129,367,159 =                               | 42,116,601 + | 87,250,558  |
| 8     | 2,574,597        | 2,446,808        | 918,980           | 791,191               | 1,681,198,356 =                                 | 475,982,722 + | 1,205,215,634 | 131,959,407 =                               | 42,552,249 + | 89,407,158  |
| 9     | 1,992,571        | 1,898,132        | 695,180           | 600,741               | 1,306,395,549 =                                 | 371,461,422 + | 934,934,127   | 100,294,995 =                               | 32,686,939 + | 67,608,056  |
| 10    | 2,246,011        | 2,145,420        | 786,737           | 686,146               | 1,484,038,224 =                                 | 426,770,806 + | 1,057,267,418 | 114,586,646 =                               | 37,957,269 + | 76,629,377  |
| 11    | 2,241,144        | 2,144,729        | 758,739           | 662,324               | 1,477,906,889 =                                 | 421,948,241 + | 1,055,958,648 | 109,601,162 =                               | 35,707,665 + | 73,893,497  |
| 12    | 2,152,949        | 2,051,957        | 747,059           | 646,067               | 1,418,690,735 =                                 | 407,634,945 + | 1,011,055,790 | 108,059,559 =                               | 35,361,194 + | 72,698,365  |
| 13    | 1,595,057        | 1,517,081        | 591,225           | 513,249               | 1,052,112,658 =                                 | 304,833,376 + | 747,279,282   | 85,982,601 =                                | 28,409,968 + | 57,572,633  |
| 14    | 1,477,988        | 1,406,101        | 523,596           | 451,709               | 970,068,468 =                                   | 277,776,895 + | 692,291,573   | 75,600,107 =                                | 24,647,165 + | 50,952,942  |
| 15    | 1,351,709        | 1,287,260        | 466,764           | 402,315               | 885,168,969 =                                   | 251,621,540 + | 633,547,429   | 67,128,688 =                                | 21,737,994 + | 45,390,694  |
| 16    | 1,501,059        | 1,431,898        | 497,060           | 427,899               | 976,581,337 =                                   | 271,471,963 + | 705,109,374   | 71,332,335 =                                | 22,986,825 + | 48,345,510  |
| 17    | 1,290,584        | 1,230,848        | 416,535           | 356,799               | 840,095,235 =                                   | 234,006,858 + | 606,088,377   | 59,898,160 =                                | 19,313,408 + | 40,584,752  |
| 18    | 1,275,859        | 1,212,338        | 477,771           | 414,250               | 838,516,668 =                                   | 241,202,386 + | 597,314,282   | 69,122,568 =                                | 22,576,114 + | 46,546,454  |
| 19    | 1,028,005        | 993,091          | 252,473           | 217,559               | 685,952,950 =                                   | 196,580,072 + | 489,372,878   | 36,536,015 =                                | 11,914,815 + | 24,621,200  |
| 20    | 1,016,303        | 964,721          | 363,883           | 312,301               | 663,506,829 =                                   | 187,934,142 + | 475,572,687   | 52,243,054 =                                | 16,822,189 + | 35,420,865  |
| 21    | 628,110          | 596,192          | 226,055           | 194,137               | 412,235,218 =                                   | 118,511,806 + | 293,723,412   | 32,855,224 =                                | 10,805,152 + | 22,050,072  |
| 22    | 625,257          | 597,558          | 199,880           | 172,181               | 413,241,926 =                                   | 119,074,286 + | 294,167,640   | 28,956,345 =                                | 9,502,483 +  | 19,453,862  |
| Total | 45,393,705       | 43,232,520       | 15,834,824        | 13,673,639            | 29,805,076,213 = 8,511,410,426 + 21,293,665,787 |               |               | 2,282,385,934 = 741,741,418 + 1,540,644,516 |              |             |
